# Supplementary material for: Variation in base composition underlies functional and evolutionary divergence in non-LTR retrotransposons
Source: PubMed Central journal article supplement (PMC7140322; doi:10.1186/s13100-020-00209-9), 2020-04-07
Supplement: 13100_2020_209_MOESM6_ESM.pdf [file 13100_2020_209_MOESM6_ESM.pdf]

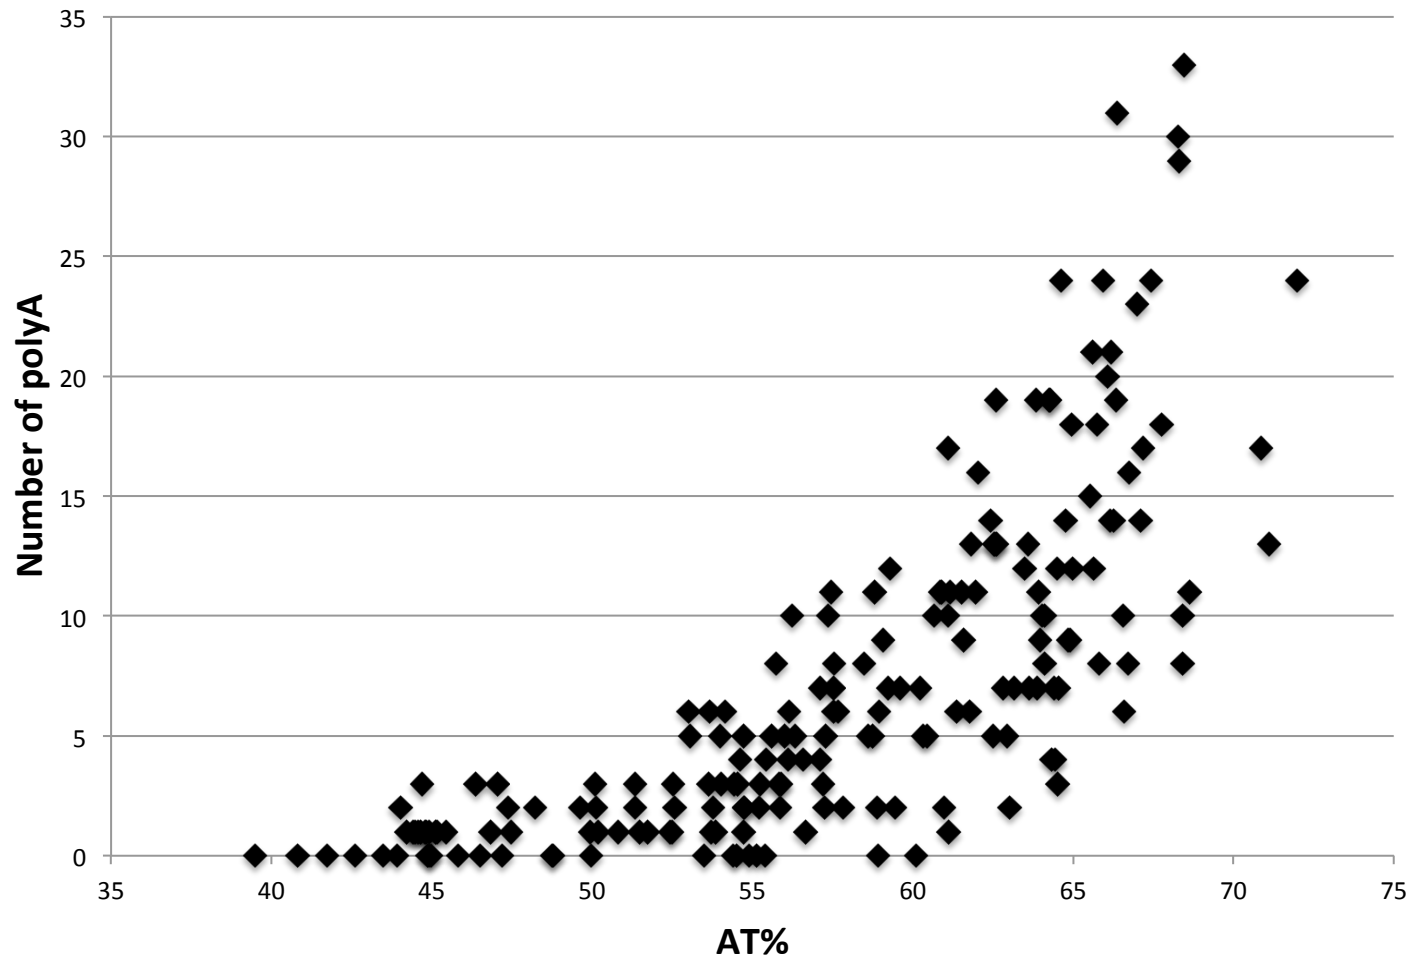

Correlation between the content in AT and the number of predicted polyadenylation signals
